# Supplementary material for: Machine-learning model derived gene signature predictive of paclitaxel survival benefit in gastric cancer: results from the randomised phase III SAMIT trial
Source: PubMed Central journal article supplement — Gut. 2021 May 12;71(4):676–85. doi: 10.1136/gutjnl-2021-324060 (PMC8921574; doi:10.1136/gutjnl-2021-324060), 2021-05-12
Supplement: gutjnl-2021-324060supp002.pdf [file gutjnl-2021-324060supp002.pdf]

**Supplementary Table 2.** Comparison of patient characteristics between original trial and biomarker cohort.

| Factors   |                | UFT arm                |    |                          |    | S-1 arm                |    |                          |    | Pac-UFT arm            |    |                          |    | Pac-S-1 arm            |    |                          |    |
|-----------|----------------|------------------------|----|--------------------------|----|------------------------|----|--------------------------|----|------------------------|----|--------------------------|----|------------------------|----|--------------------------|----|
|           |                | original trial (n=374) |    | biomarker cohort (n=124) |    | original trial (n=374) |    | biomarker cohort (n=124) |    | original trial (n=374) |    | biomarker cohort (n=123) |    | original trial (n=373) |    | biomarker cohort (n=128) |    |
|           |                | No.                    | %  | No.                      | %  |
| Age       | Median (range) | 65(29-80)              |    | 65(29-80)                |    | 65(30-80)              |    | 65(38-80)                |    | 65(22-80)              |    | 66(30-80)                |    | 65(36-80)              |    | 67(37-80)                |    |
| Gender    | Male           | 260                    | 70 | 87                       | 70 | 254                    | 68 | 77                       | 62 | 253                    | 68 | 86                       | 70 | 262                    | 70 | 93                       | 73 |
|           | Female         | 114                    | 30 | 37                       | 30 | 120                    | 32 | 47                       | 38 | 121                    | 32 | 37                       | 30 | 111                    | 30 | 35                       | 27 |
| PS        | 0              | 329                    | 88 | 107                      | 86 | 323                    | 86 | 103                      | 83 | 319                    | 85 | 101                      | 82 | 316                    | 85 | 105                      | 82 |
|           | 1              | 45                     | 12 | 17                       | 14 | 51                     | 14 | 21                       | 17 | 55                     | 15 | 22                       | 18 | 57                     | 15 | 23                       | 18 |
| Histology | Diff           | 143                    | 38 | 45                       | 36 | 150                    | 40 | 52                       | 42 | 137                    | 37 | 49                       | 40 | 141                    | 38 | 55                       | 43 |
|           | Undiff         | 219                    | 59 | 77                       | 63 | 212                    | 57 | 70                       | 56 | 222                    | 59 | 71                       | 58 | 217                    | 58 | 72                       | 56 |
|           | Others         | 12                     | 3  | 1                        | 1  | 12                     | 3  | 2                        | 2  | 14                     | 4  | 2                        | 2  | 15                     | 4  | 1                        | 1  |
| T stage   | pT1            | 4                      | 1  | 2                        | 2  | 5                      | 1  | 4                        | 3  | 3                      | 1  | 0                        | 0  | 3                      | 1  | 0                        | 0  |
|           | pT2            | 88                     | 24 | 40                       | 32 | 96                     | 26 | 38                       | 30 | 86                     | 24 | 32                       | 26 | 98                     | 27 | 42                       | 33 |
|           | pT3            | 248                    | 68 | 77                       | 62 | 253                    | 69 | 80                       | 65 | 250                    | 68 | 83                       | 67 | 244                    | 67 | 81                       | 64 |
|           | pT4            | 25                     | 7  | 5                        | 4  | 15                     | 4  | 2                        | 2  | 27                     | 7  | 7                        | 6  | 19                     | 5  | 4                        | 3  |
| N stage   | pN0            | 67                     | 18 | 17                       | 14 | 63                     | 17 | 25                       | 20 | 73                     | 20 | 34                       | 28 | 67                     | 18 | 28                       | 22 |
|           | pN1            | 137                    | 38 | 46                       | 37 | 146                    | 40 | 51                       | 41 | 148                    | 40 | 41                       | 33 | 135                    | 37 | 39                       | 31 |
|           | pN2            | 157                    | 43 | 59                       | 47 | 155                    | 42 | 46                       | 37 | 141                    | 39 | 46                       | 38 | 155                    | 43 | 55                       | 43 |
|           | pN3            | 4                      | 1  | 2                        | 2  | 5                      | 1  | 2                        | 2  | 4                      | 1  | 1                        | 1  | 7                      | 2  | 5                        | 4  |

Wilcoxon  $p > 0.05$  for age comparisons between original trial and biomarker cohort, Fisher's Exact  $p > 0.05$  for gender, PS, histology, T stage and N stage for all comparisons between original trial and biomarker cohort. Similarly, there was no statistically significant difference Summary: No statistically significant differences in patient characteristics between original trial cohort and biomarker cohort.

**Supplementary Table 3.** Comparison of patient characteristics between QC fail samples and biomarker cohort.

| Factors   |                | UFT arm        |    |                          |    | S-1 arm        |    |                          |    | Pac-UFT arm    |    |                          |    | Pac-S-1 arm    |    |                          |    |
|-----------|----------------|----------------|----|--------------------------|----|----------------|----|--------------------------|----|----------------|----|--------------------------|----|----------------|----|--------------------------|----|
|           |                | QC fail (n=10) |    | biomarker cohort (n=124) |    | QC fail (n=12) |    | biomarker cohort (n=124) |    | QC fail (n=16) |    | biomarker cohort (n=123) |    | QC fail (n=15) |    | biomarker cohort (n=128) |    |
|           |                | No.            | %  | No.                      | %  |
| Age       | Median (range) | 60(37-79)      |    | 64(29-80)                |    | 61(42-80)      |    | 65(38-80)                |    | 60(35-78)      |    | 66(30-80)                |    | 63(50-79)      |    | 67(37-80)                |    |
| Gender    | Male           | 8              | 80 | 87                       | 70 | 8              | 67 | 77                       | 62 | 8              | 50 | 86                       | 70 | 11             | 73 | 93                       | 73 |
|           | Female         | 2              | 20 | 37                       | 30 | 4              | 33 | 47                       | 38 | 8              | 50 | 37                       | 30 | 4              | 27 | 35                       | 27 |
| PS        | 0              | 8              | 80 | 107                      | 86 | 10             | 83 | 103                      | 83 | 13             | 81 | 101                      | 82 | 11             | 73 | 105                      | 82 |
|           | 1              | 2              | 20 | 17                       | 14 | 2              | 17 | 21                       | 17 | 3              | 19 | 22                       | 18 | 4              | 27 | 23                       | 18 |
| Histology | Diff           | 1              | 10 | 45                       | 36 | 6              | 50 | 52                       | 42 | 3              | 19 | 49                       | 40 | 2              | 13 | 55                       | 43 |
|           | Undiff/Others  | 8              | 80 | 78                       | 64 | 4              | 33 | 72                       | 58 | 12             | 75 | 73                       | 60 | 10             | 67 | 73                       | 57 |
| T stage   | pT1/2          | 1              | 10 | 42                       | 34 | 4              | 33 | 42                       | 34 | 2              | 13 | 32                       | 26 | 4              | 27 | 42                       | 33 |
|           | pT3/4          | 8              | 80 | 82                       | 66 | 6              | 50 | 82                       | 66 | 13             | 81 | 90                       | 73 | 8              | 53 | 85                       | 66 |
| N stage   | pN0/1          | 3              | 30 | 63                       | 51 | 3              | 25 | 76                       | 61 | 11             | 69 | 75                       | 61 | 8              | 53 | 67                       | 52 |
|           | pN2/3          | 6              | 60 | 61                       | 49 | 7              | 58 | 48                       | 39 | 4              | 25 | 47                       | 38 | 4              | 27 | 60                       | 47 |

Wilcoxon  $p > 0.05$  for age comparisons between QC fail samples and biomarker cohort, Fisher's Exact  $p > 0.05$  for gender, PS, histology, T stage and N stage for all comparisons.

**Supplementary Table 4.** Clinicopathologic characteristics of SAMIT Pac-UFT patients by gene signature

| Characteristics             |                | Pac-UFT<br>(N = 123) |    |                      |    | p-val* |
|-----------------------------|----------------|----------------------|----|----------------------|----|--------|
|                             |                | <i>Pac-Sensitive</i> |    | <i>Pac-Resistant</i> |    |        |
|                             |                | (N = 98)             |    | (N = 25)             |    |        |
|                             |                | n                    | %  | n                    | %  |        |
| <b>Age</b>                  | Median (years) | 65                   |    | 68                   |    | 0.12   |
| <b>Gender</b>               | Male           | 67                   | 68 | 19                   | 76 | 0.63   |
|                             | Female         | 31                   | 32 | 6                    | 24 |        |
| <b>PS</b>                   | ECOG 0         | 80                   | 82 | 21                   | 84 | 1      |
|                             | ECOG 1         | 18                   | 18 | 4                    | 16 |        |
| <b>Histological subtype</b> | Diff           | 38                   | 39 | 11                   | 44 | 0.65   |
|                             | Undiff/ others | 60                   | 61 | 14                   | 56 |        |
| <b>Tumor category</b>       | pT1/2          | 26                   | 27 | 6                    | 24 | 1      |
|                             | pT3/4          | 71                   | 72 | 19                   | 76 |        |
| <b>Node category</b>        | pN0/1          | 62                   | 63 | 13                   | 52 | 0.36   |
|                             | pN2/3          | 35                   | 36 | 12                   | 48 |        |

\*p value of Fisher's Exact test between *Pac-Sensitive* and *Pac-Resistant*

PS = performance status, Diff = differentiated, Undiff = undifferentiated.
