# Supplementary material for: Machine-learning model derived gene signature predictive of paclitaxel survival benefit in gastric cancer: results from the randomised phase III SAMIT trial
Source: PubMed Central journal article supplement — Gut. 2021 May 12;71(4):676–85. doi: 10.1136/gutjnl-2021-324060 (PMC8921574; doi:10.1136/gutjnl-2021-324060), 2021-05-12
Supplement: gutjnl-2021-324060supp003.pdf [file gutjnl-2021-324060supp003.pdf]

Supplementary Figure 1

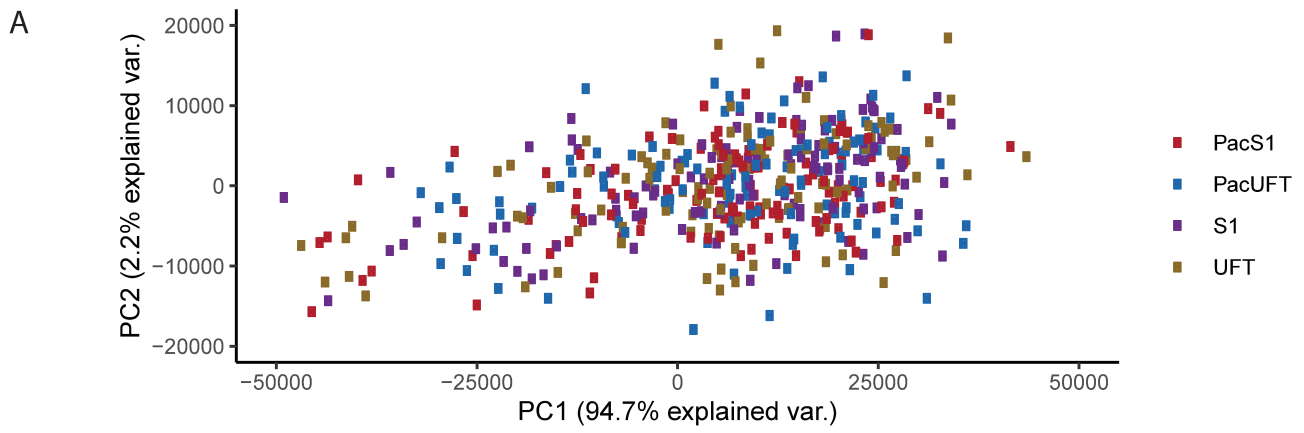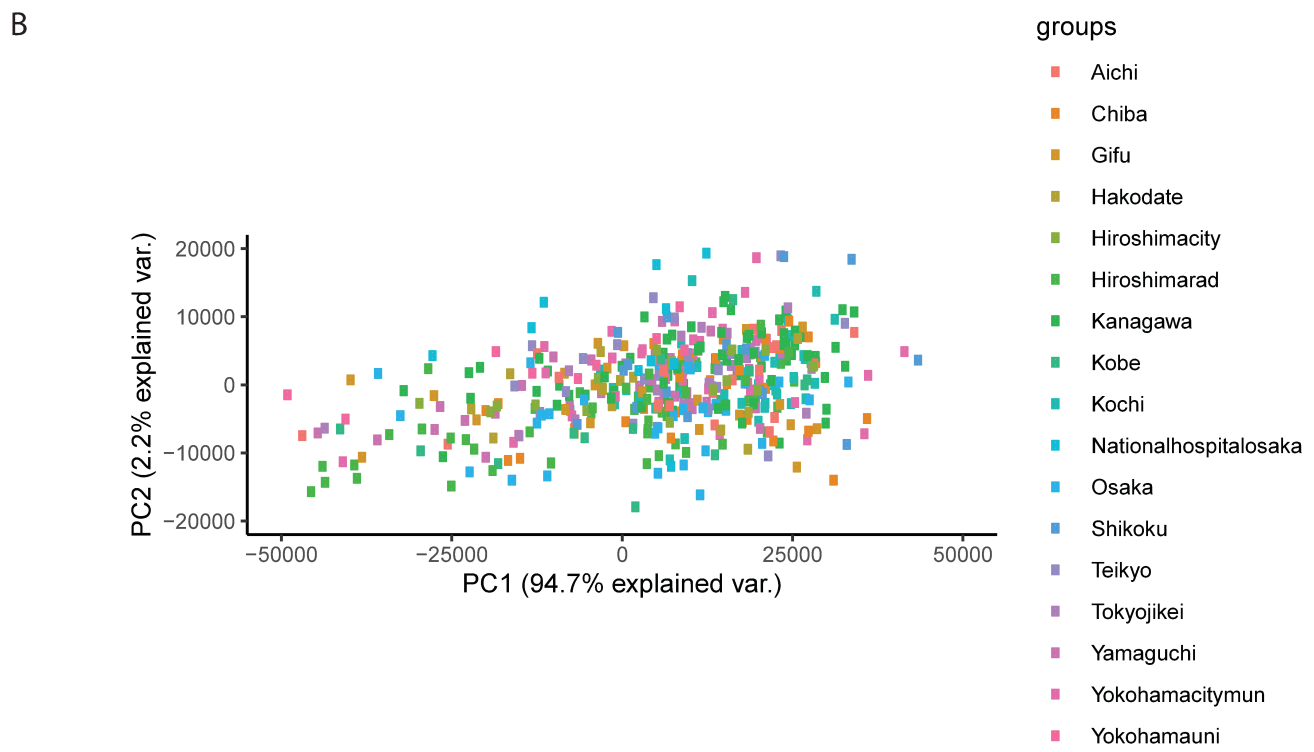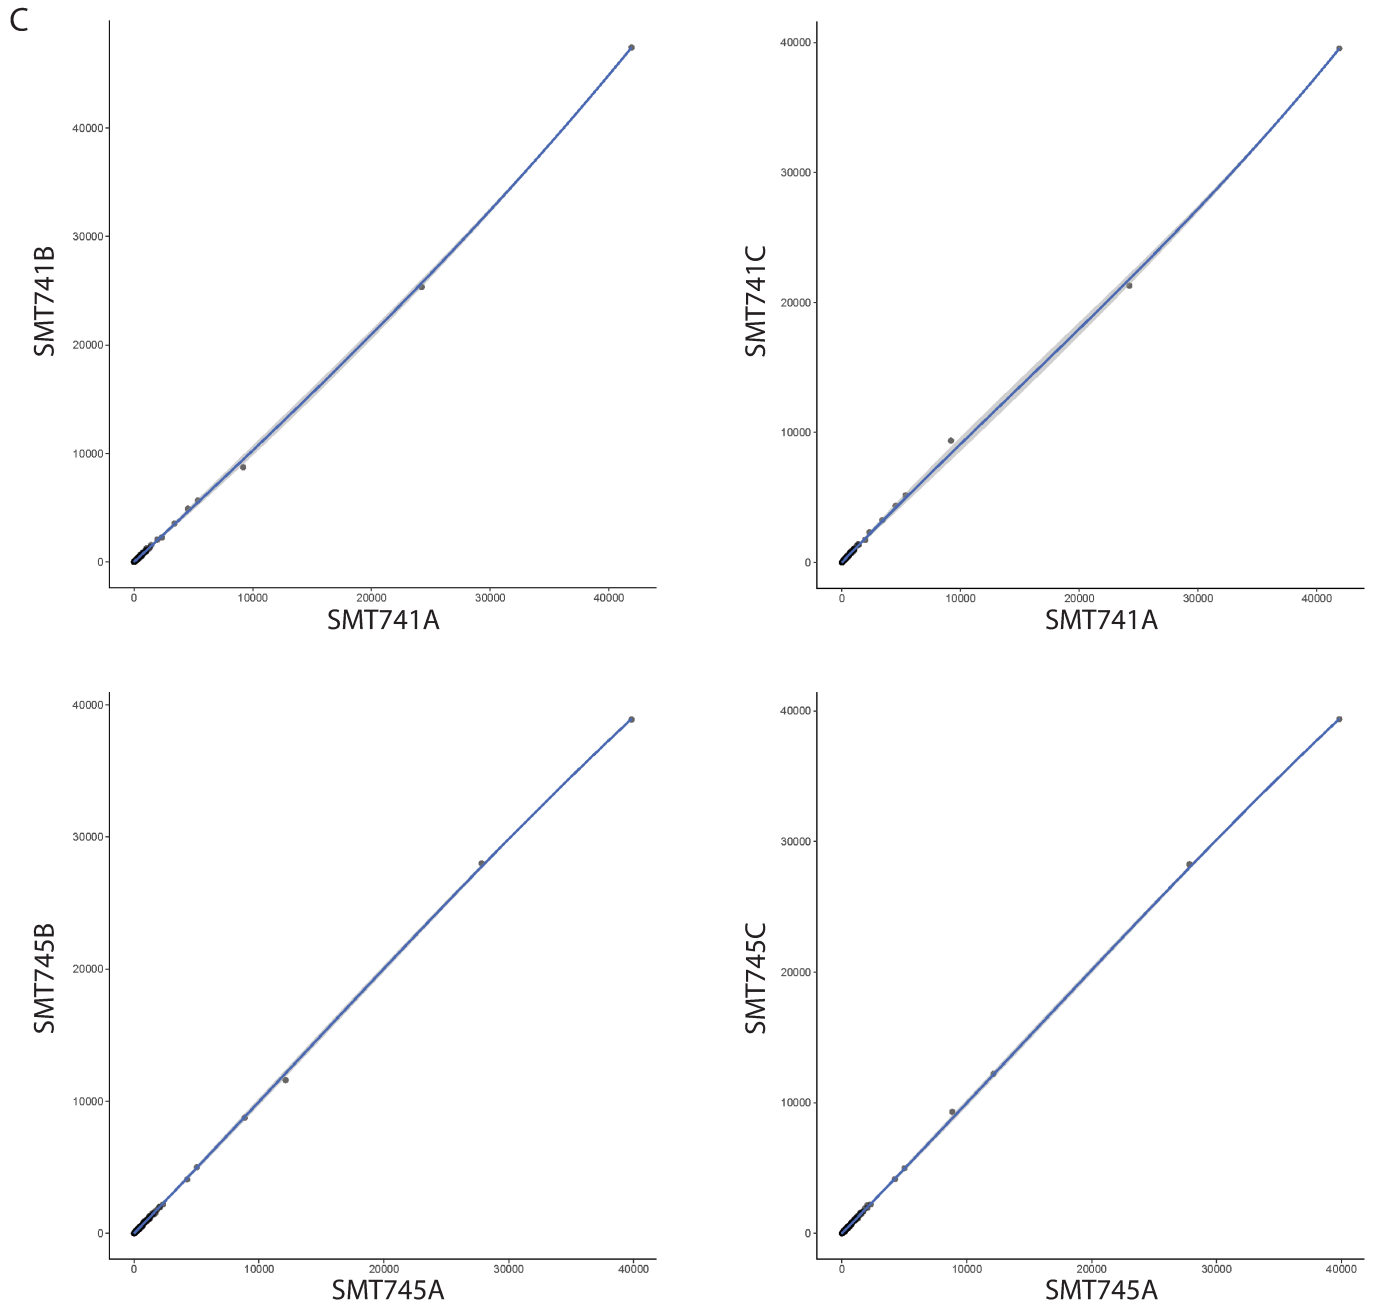

## Supplementary Figure 2

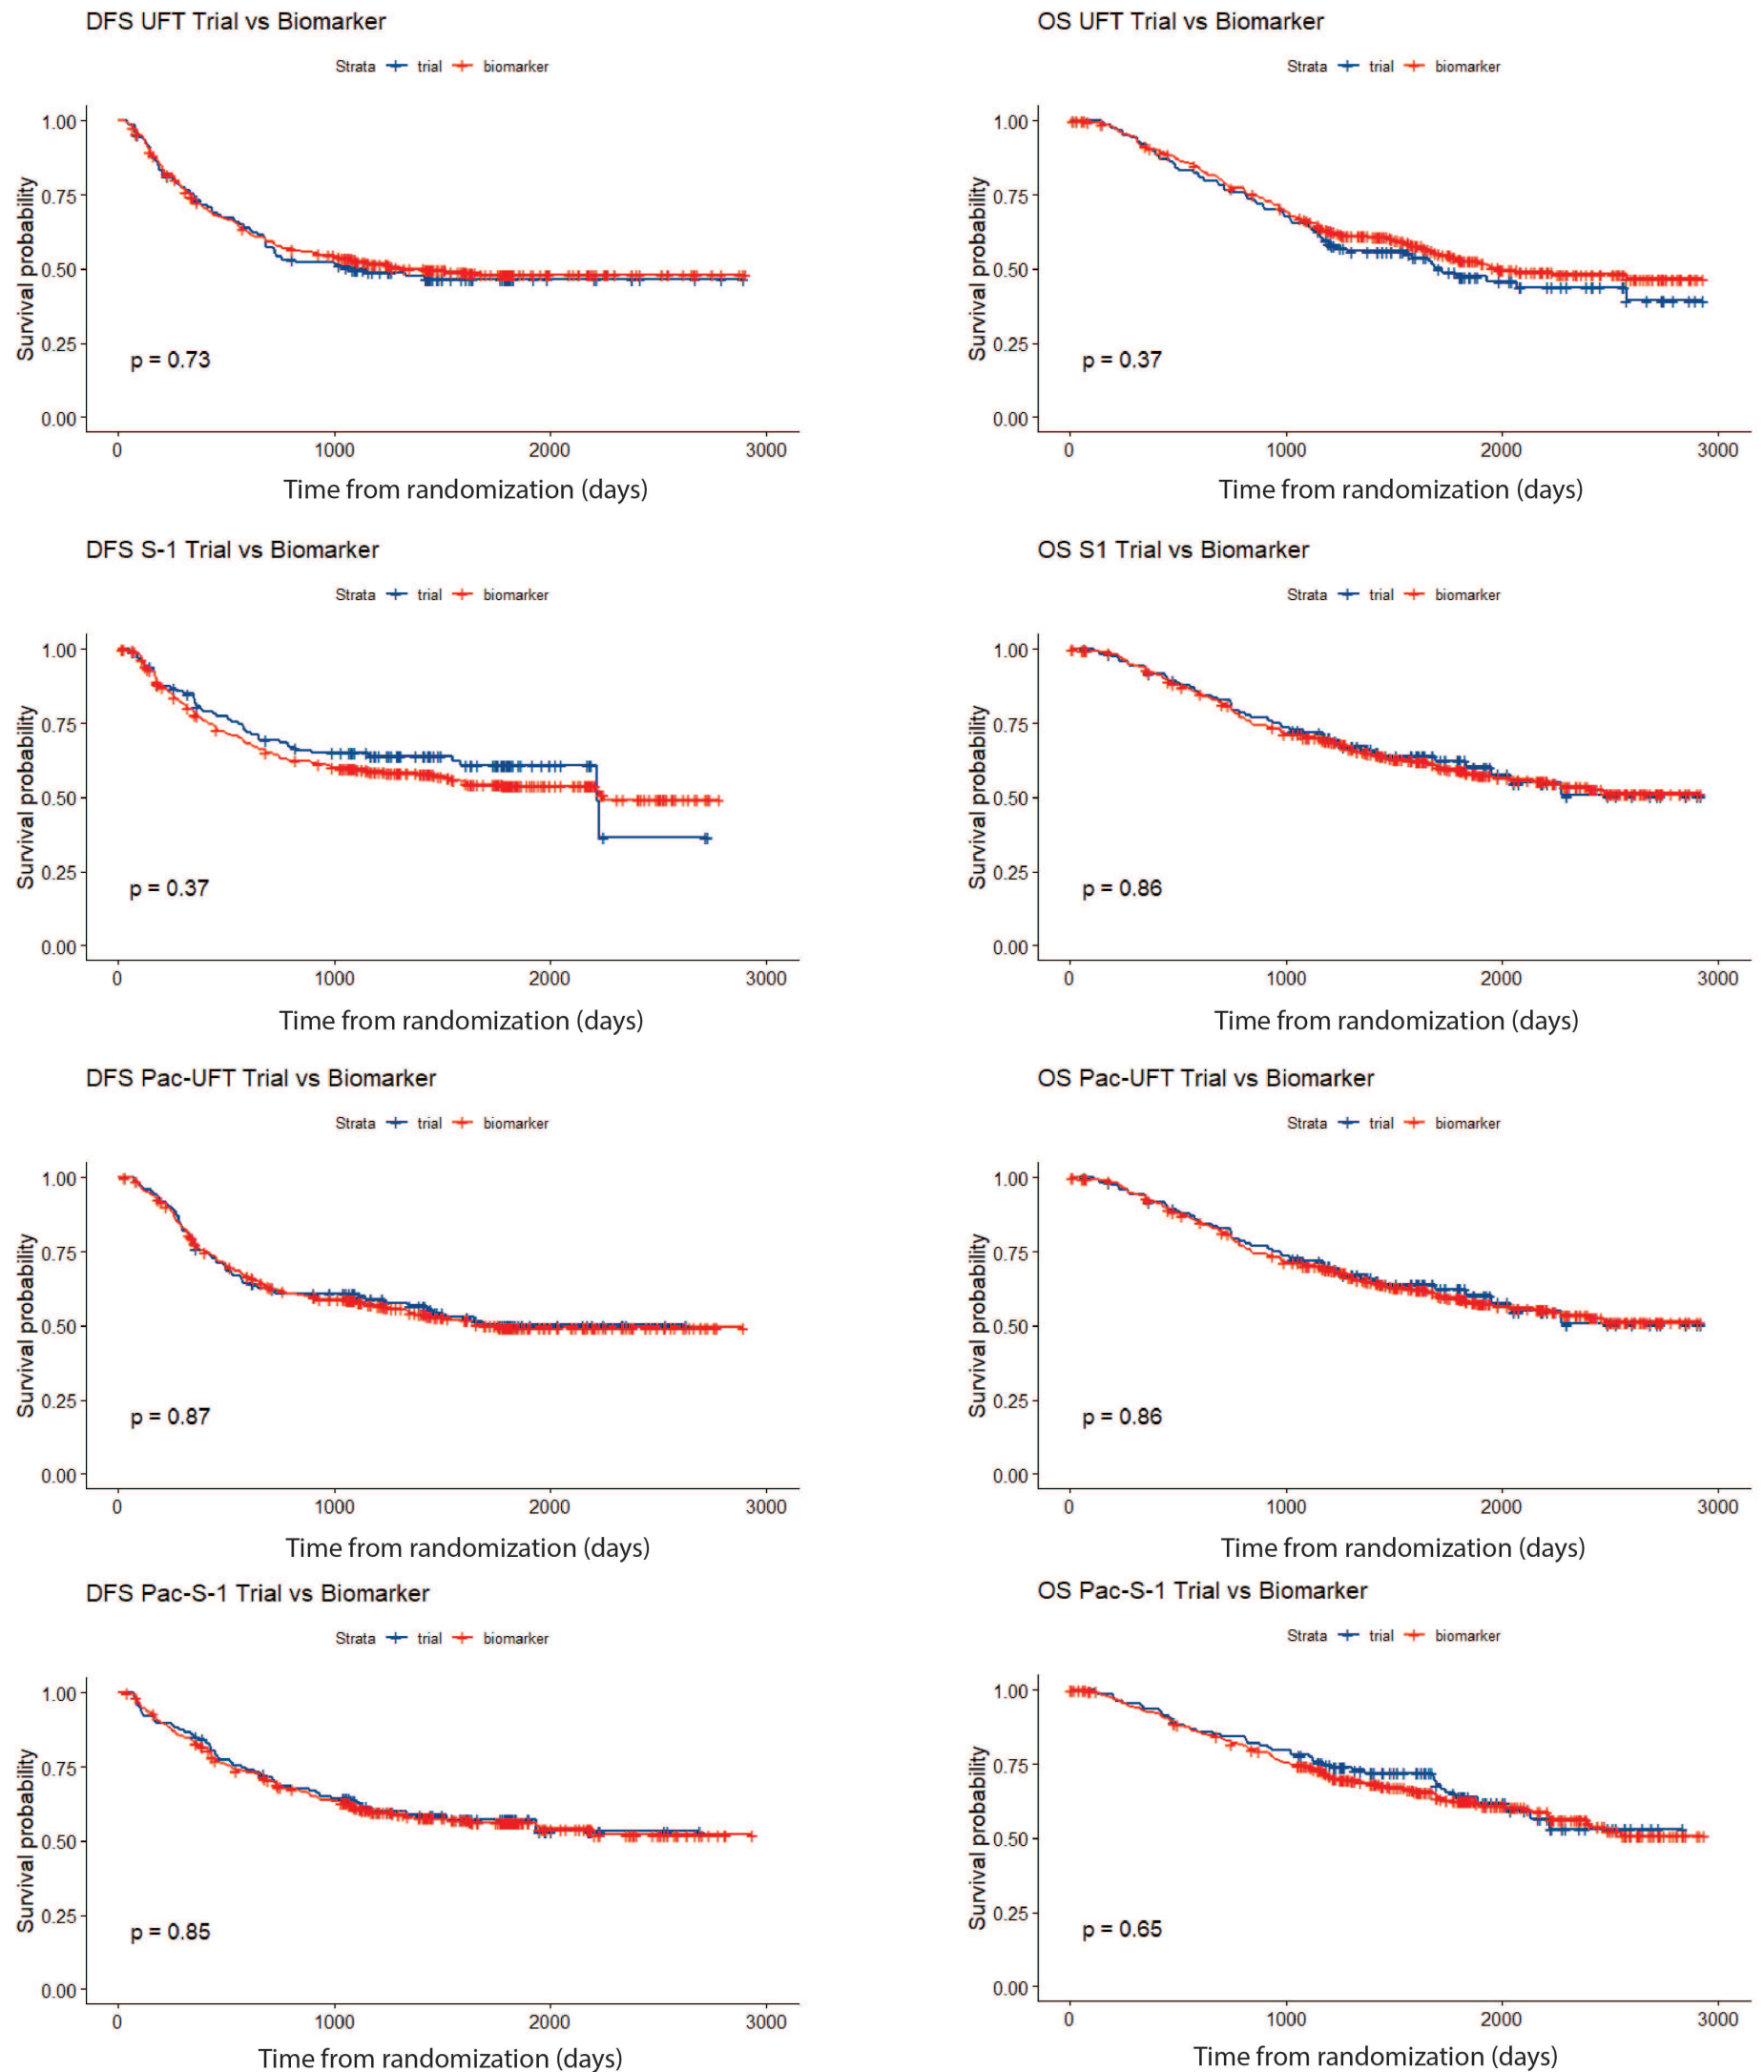

## Supplementary Figure 3

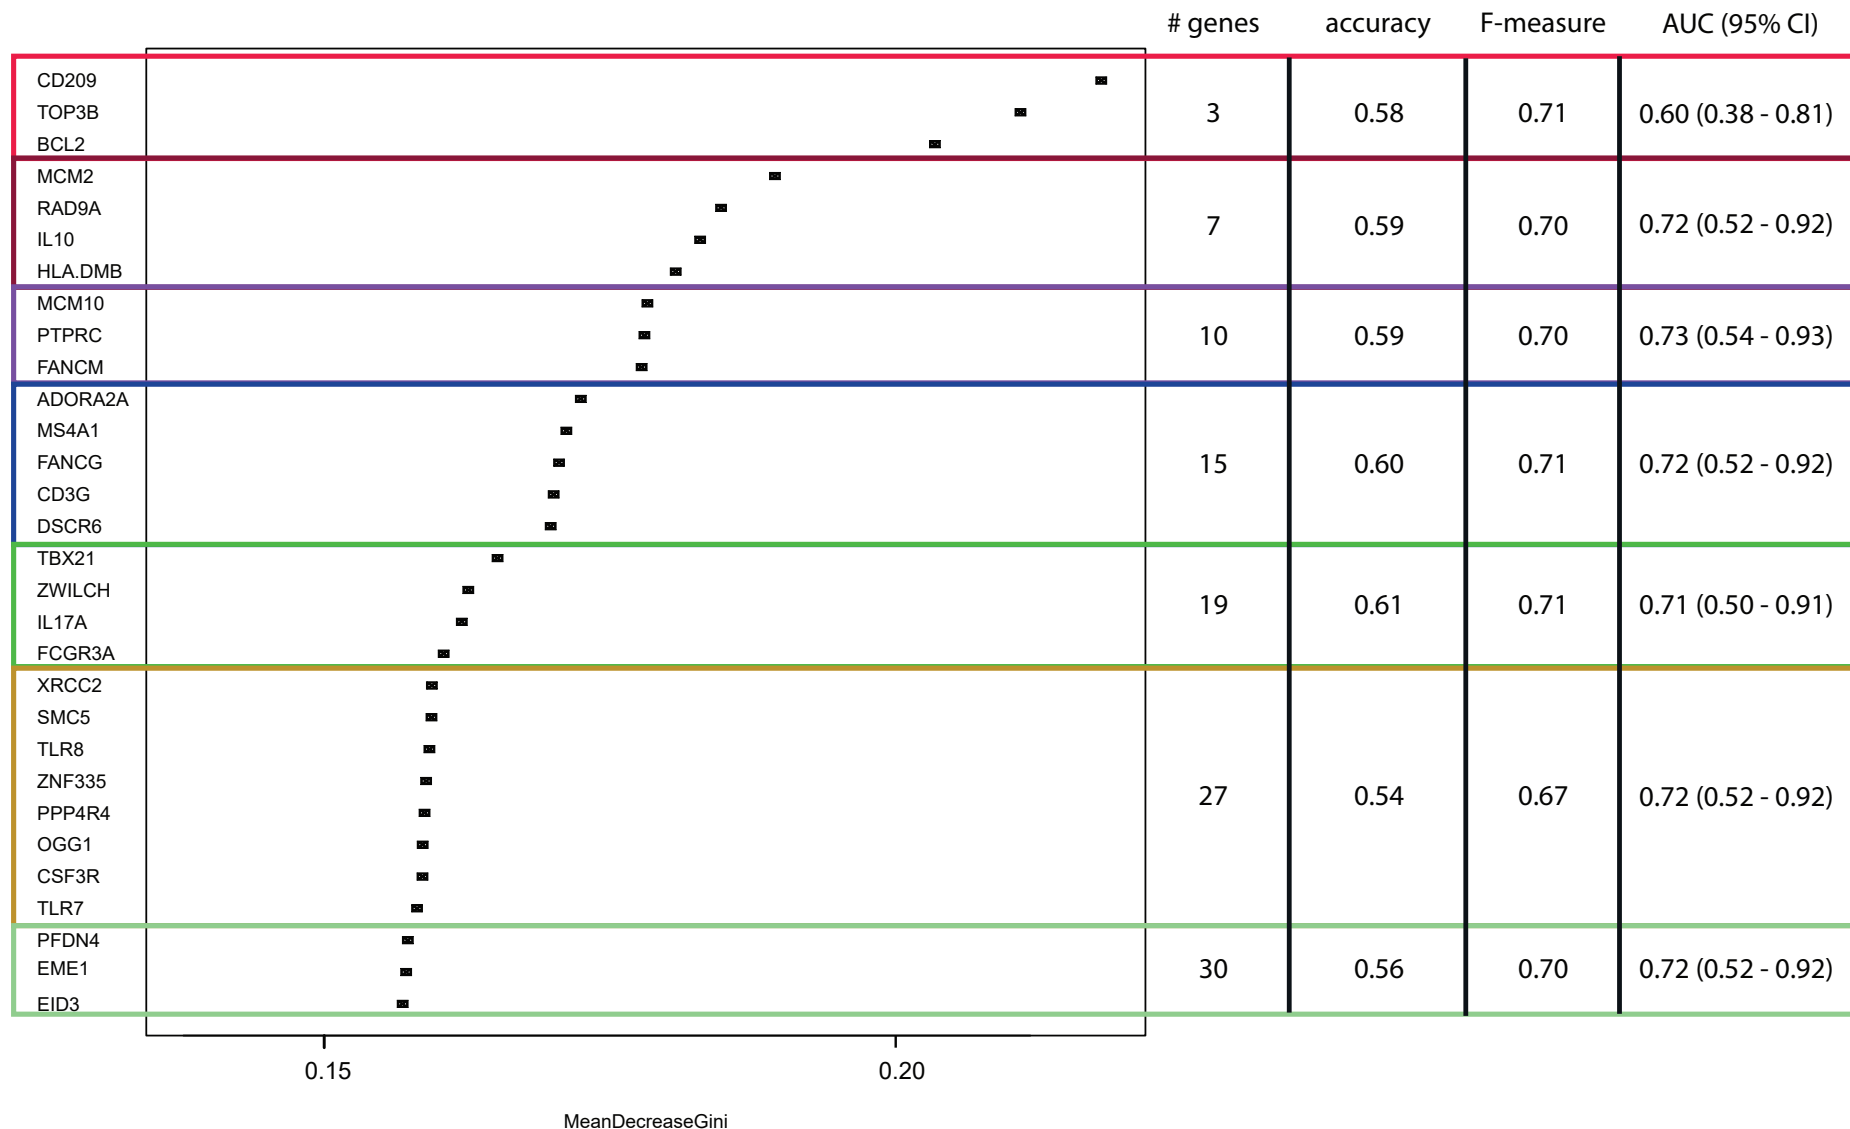

## Supplementary Figure 4

## Gene signature in UFT/S-1 cohort

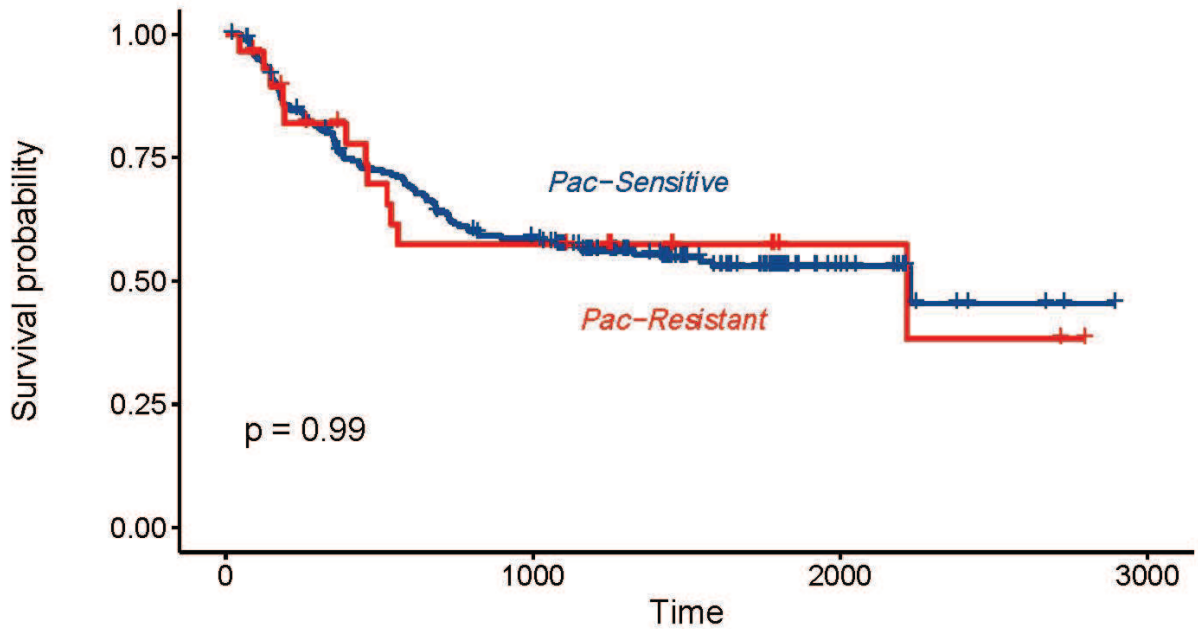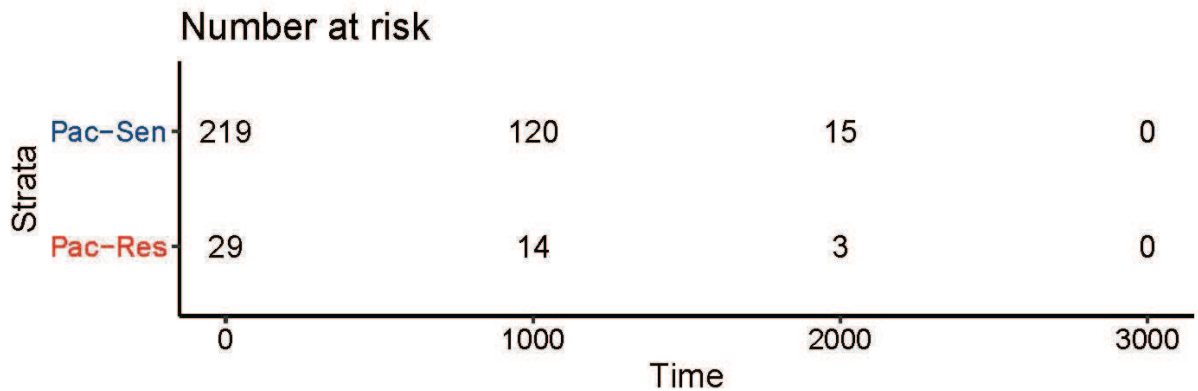

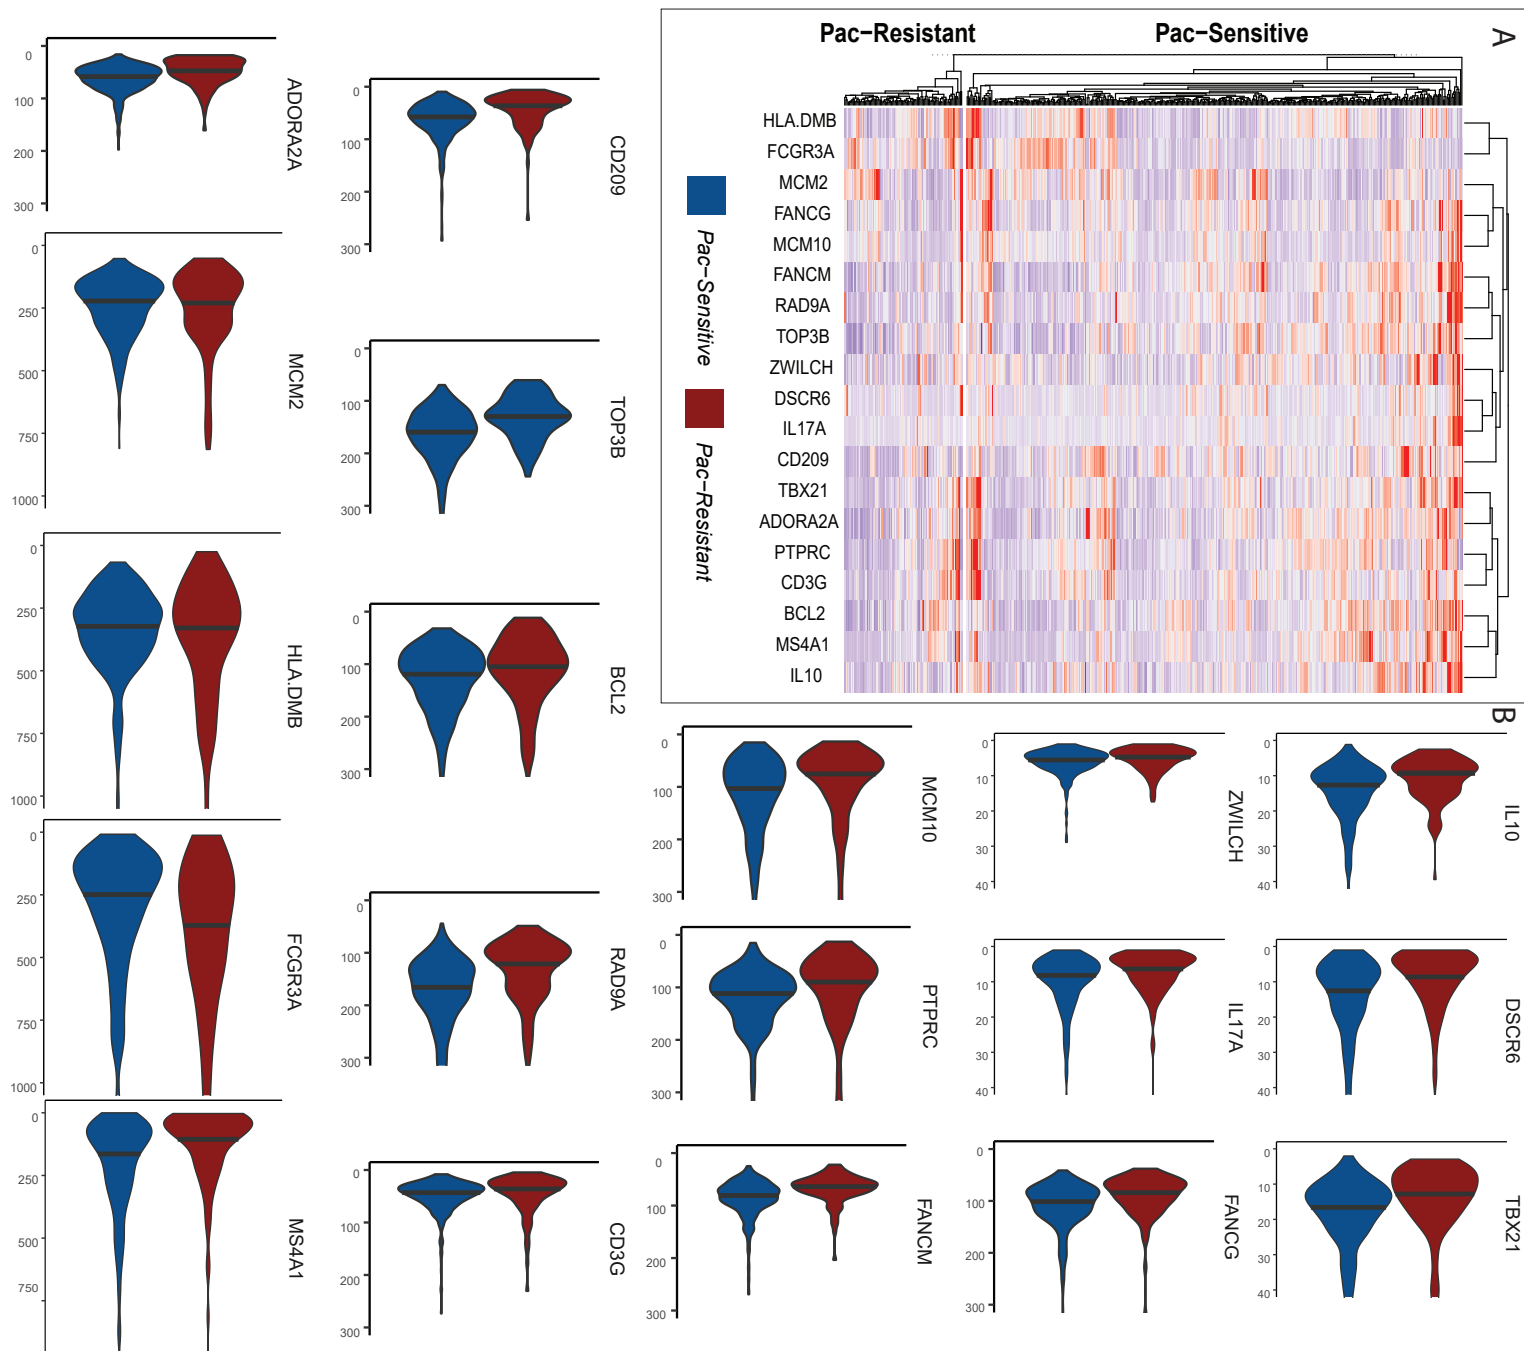

### Supplementary Figure Legends

#### Supplementary Figure 1. QC of NanoString Panel

A: Principal component analysis of NanoString profiles by treatment arm: No obvious clustering seen suggesting batch effect or treatment effect

B: Principal component analysis of NanoString profiles by treatment centre: No obvious clustering seen suggesting batch effect

C: 2 samples were tested in triplicates in the NanoString profiling (SMT 741 and SMT 745). Analysis of the results between the triplicates yielded a very high correlation. Spearman's  $R = 0.99$ ,  $p < 0.001$  for all comparisons

#### Supplementary Figure 2. Kaplan-Meier curves of original trial and biomarker cohort

Survival curves of disease free survival (DFS) and overall survival (OS) of between the original SAMIT trial and the biomarker sub-study, by trial arms are displayed. Original trial ("Trial") is depicted by blue lines, while biomarker sub-study ("Biomarker") is depicted by red lines. There is no statistically significant difference in survival in any of the arms, between Trial and Biomarker.

**Supplementary Figure 3.** Variable importance plot (or Gini Index) of genes included in the NanoString panel after running random forest on the Pac-S1 arm. The higher the index, the larger the importance of the variable to the gene-signature. Sensitivity analysis was performed using accuracy and F-measure on the Pac-UFT arm at various gene number cut-points, before selecting the 19-gene signature for future analysis.

**Supplementary Figure 4.** Kaplan-Meier curve of DFS of patients classified by the random forest 19-gene signature into *Pac-Sensitive* (blue) and *Pac-Resistant* (red) groups in the validation S-1 and UFT arms. HR 0.99, 95% CI: 0.55 to 1.82,  $p = 0.99$

#### Supplementary Figure 5. Transcriptomic characteristics of paclitaxel gene signature

A: Heatmap of NanoString profile of the 19 selected genes in signature, by *Pac-Sensitive* and *Pac-Resistant* grouping. NanoString gene expression is represented in columns, scaled. Blue to red denotes gene expression, with blue implying low gene expression and red implying high gene expression.

B: Violin plot of gene expression levels of 19 selected genes by pairwise between *Pac-Sensitive* and *Pac-Resistant* grouping.
